# Supplementary material for: TRIM7 Restricts Coxsackievirus and Norovirus Infection by Detecting the C-Terminal Glutamine Generated by 3C Protease Processing
Source: MDPI journal article supplement (doi:10.3390/v14081610), 2022-07-23
Supplement: s1 [file s1]

**Figure S1.** ITC traces for GYG protein and main peptides

**A**

Human GYG1 vs  
Human TRIM7

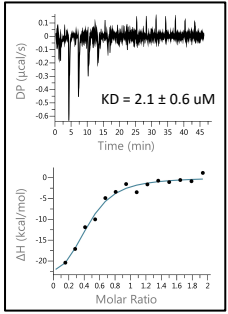

**B**

Rabbit Glycogenin  
vs Mouse TRIM7

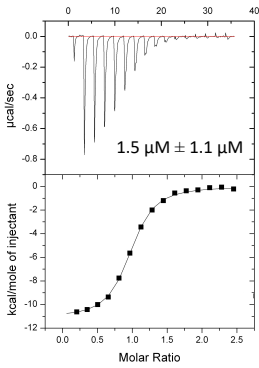

**C**

Mouse Glycogenin  
vs Mouse TRIM7

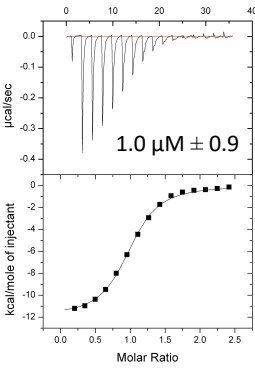

**D**

rGYG1<sub>1-246</sub> vs  
Human TRIM7

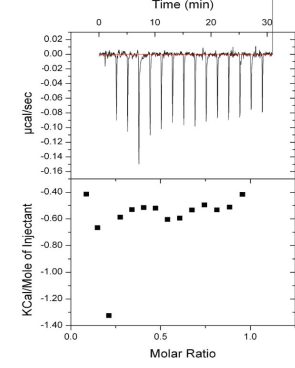

**E**

rGYG1<sub>1-299</sub> vs  
Human TRIM7

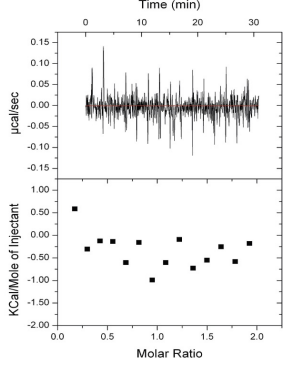

**GYG1<sub>322-333</sub>**      **RACO-1<sub>229-237</sub>**      **2BC<sub>1434-1440</sub>**      **NS6<sub>1171-1177</sub>**

**F**

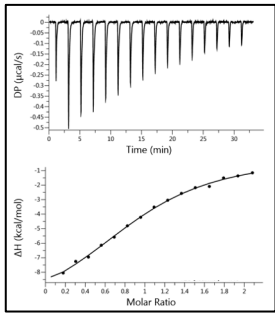

**G**

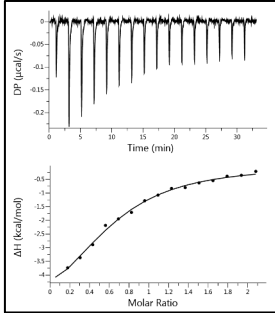

**H**

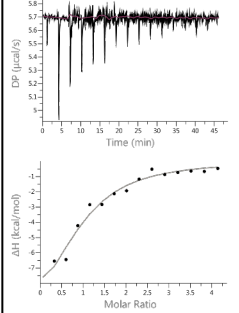

**I**

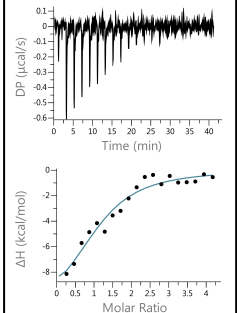

**J**

NS3 (HDDFGLQ) vs WT

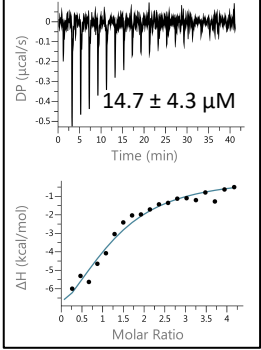

**K**

NS3 vs R385A

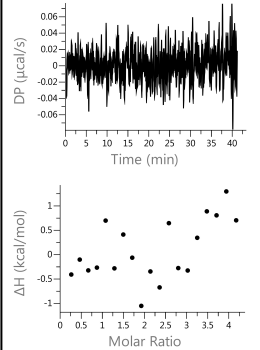

**L**

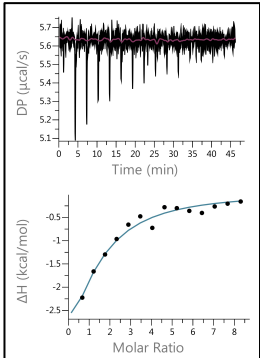

Ac-LLQ

**M**

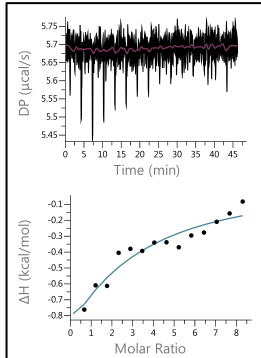

Ac-LQ

**N**

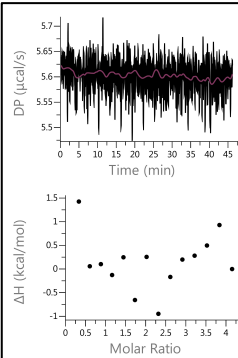

AAAAAA

**O**

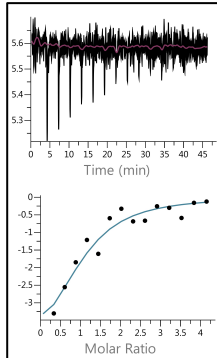

AAAAALQ

**P**

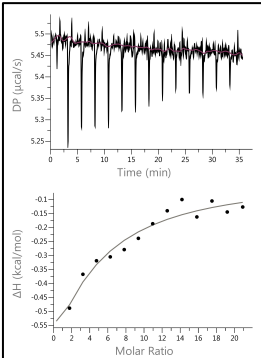

LQ

**Figure S2.** Crystal structures of TRIM7-peptide complexes

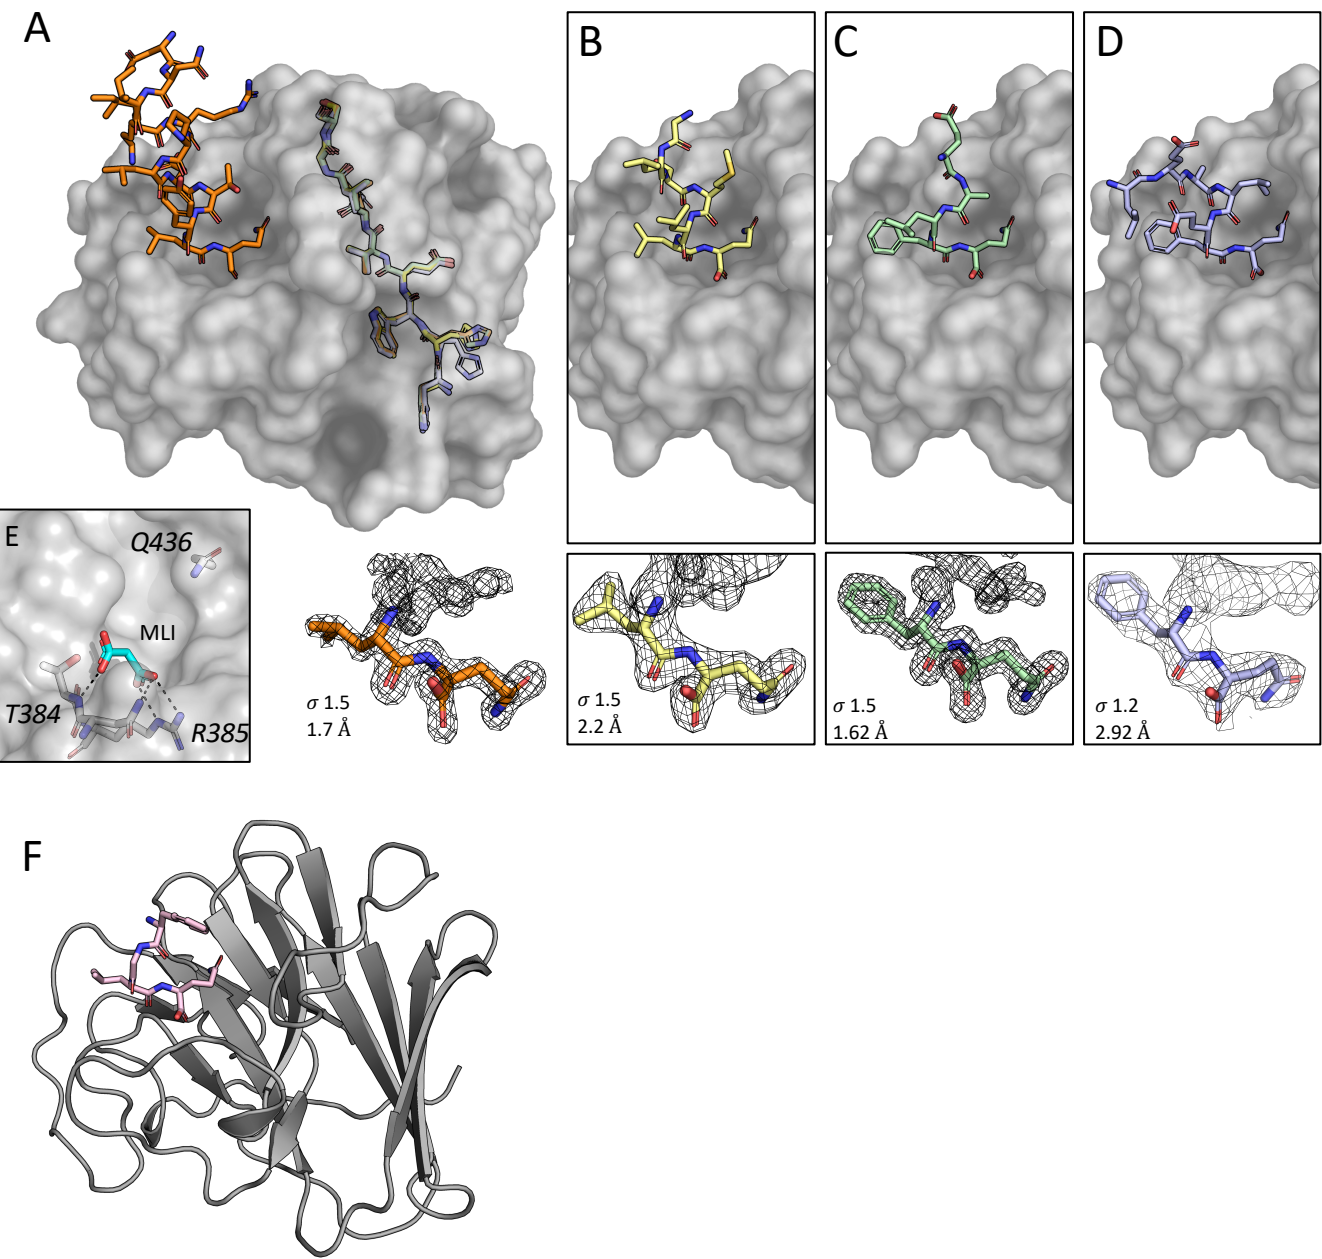

Figure S3 ITC traces for mutant TRIM7 proteins and peptides

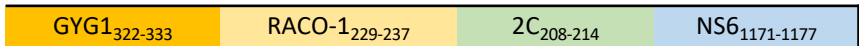

N383A

T384A

R385A

L423A

F426A

Q436A

N438A

2BC<sub>T1423A</sub>

2BC<sub>Q1429A</sub>

| Trim7 | GYG1 <sub>322-333</sub> | RACO-1 <sub>229-237</sub> | 2BC <sub>1423-1429</sub> | NS6 <sub>1171-1177</sub> |
|-------|-------------------------|---------------------------|--------------------------|--------------------------|
| WT    | 8 ± 0.6 μM              | 7.9 ± 1.0 μM              | 11.2 ± 4.2 μM            | 8.7 ± 3.2 μM             |
| N383A | No Binding              | No Binding                | No binding               | NT                       |
| T384A | 22.6 ± 6.6 μM           | 12.3 ± 2.0 μM             | 21.2 ± 5.84 μM           | NT                       |
| R385A | No Binding              | No Binding                | No binding               | No binding               |
| L423A | No Binding*             | No Binding*               | No binding*              | NT                       |
| F426A | No Binding              | No Binding                | No binding               | NT                       |
| Q436A | No Binding              | No Binding                | No binding               | NT                       |
| N438A | 2.3 ± 0.3 μM            | 3.9 μM ± 1.8 μM           | 7.82 ± 1.18 μM           | NT                       |

Figure S4. GYG isoforms

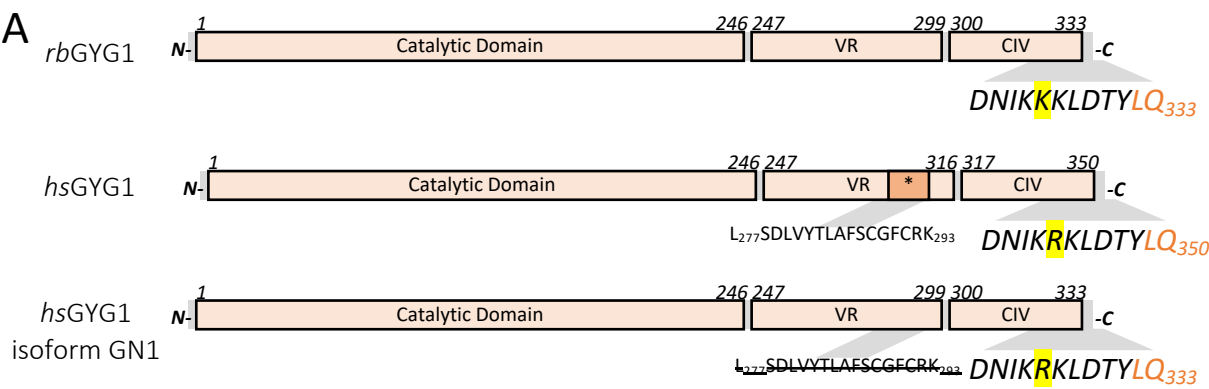

**Figure S5. GYG1 colocalizes to TRIM7 cytoplasmic bodies**

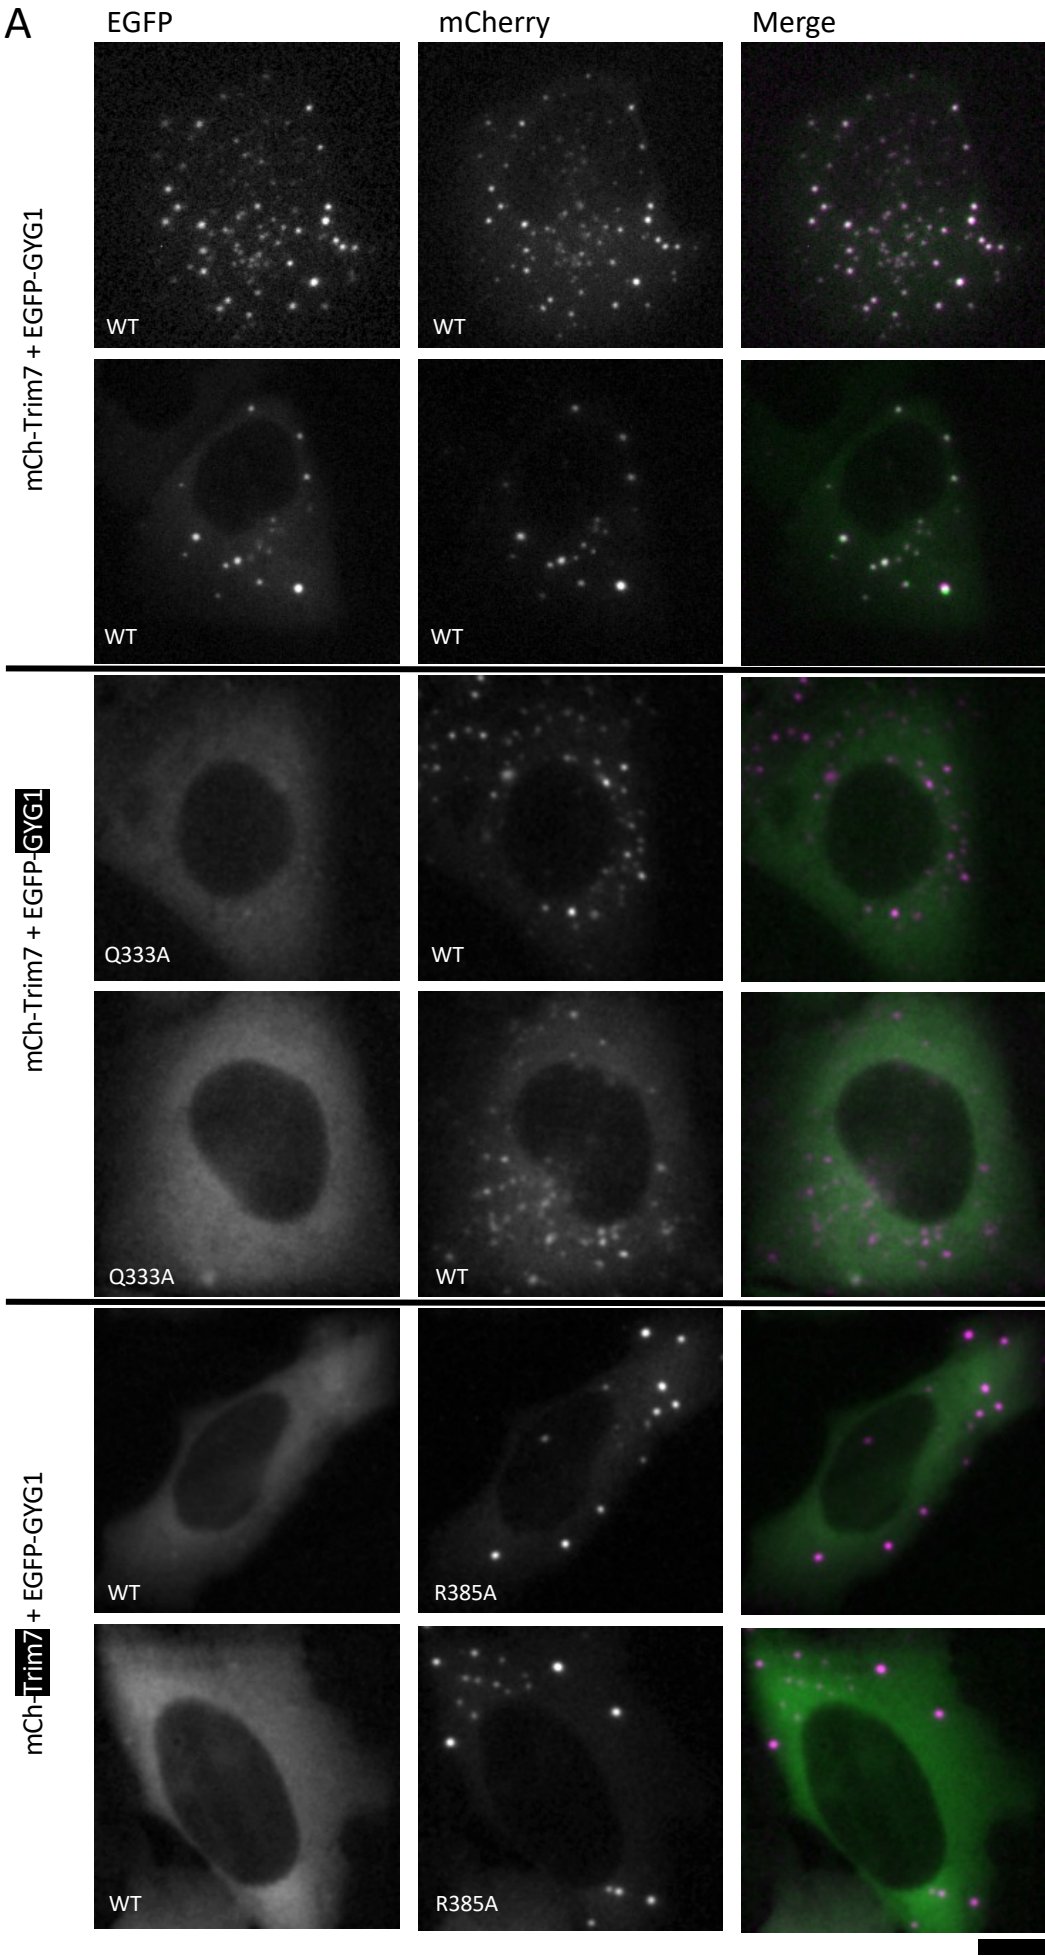

**Figure S6.** Stable cell line validation.

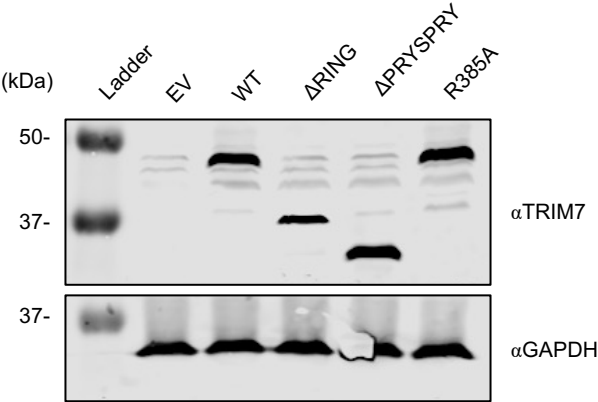

**Figure S7.** SARS-CoV-2 infection is not restricted by TRIM7

**A**

| Protein | C-term |
|---------|--------|
| NSP4    | 'LQ'   |
| NSP5    | 'FQ'   |
| NSP6    | 'VQ'   |
| NSP7    | 'LQ'   |
| NSP8    | 'LQ'   |
| NSP9    | 'LQ'   |
| NSP10   | 'LQ'   |
| NSP11   |        |
| NSP12   | 'LQ'   |
| NSP13   | 'LQ'   |
| NSP14   | 'LQ'   |
| NSP15   | 'LQ'   |

**B**

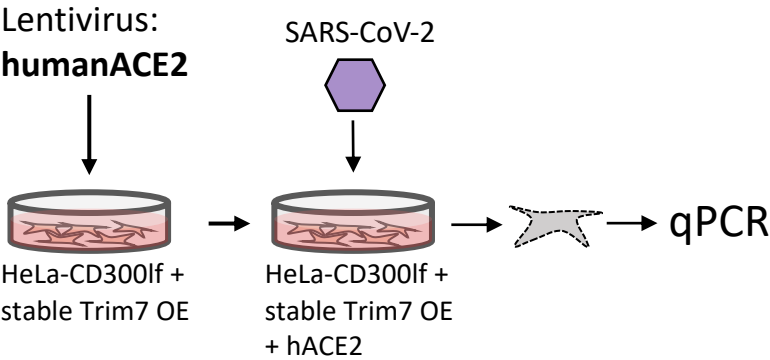

**C**

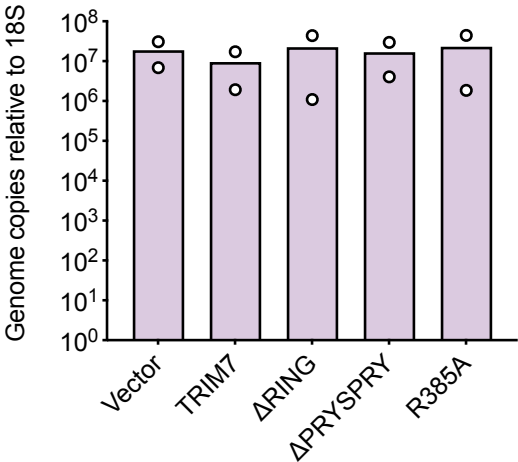

Figure S8. Phylogenetic trees for GYG1 and TRIM7

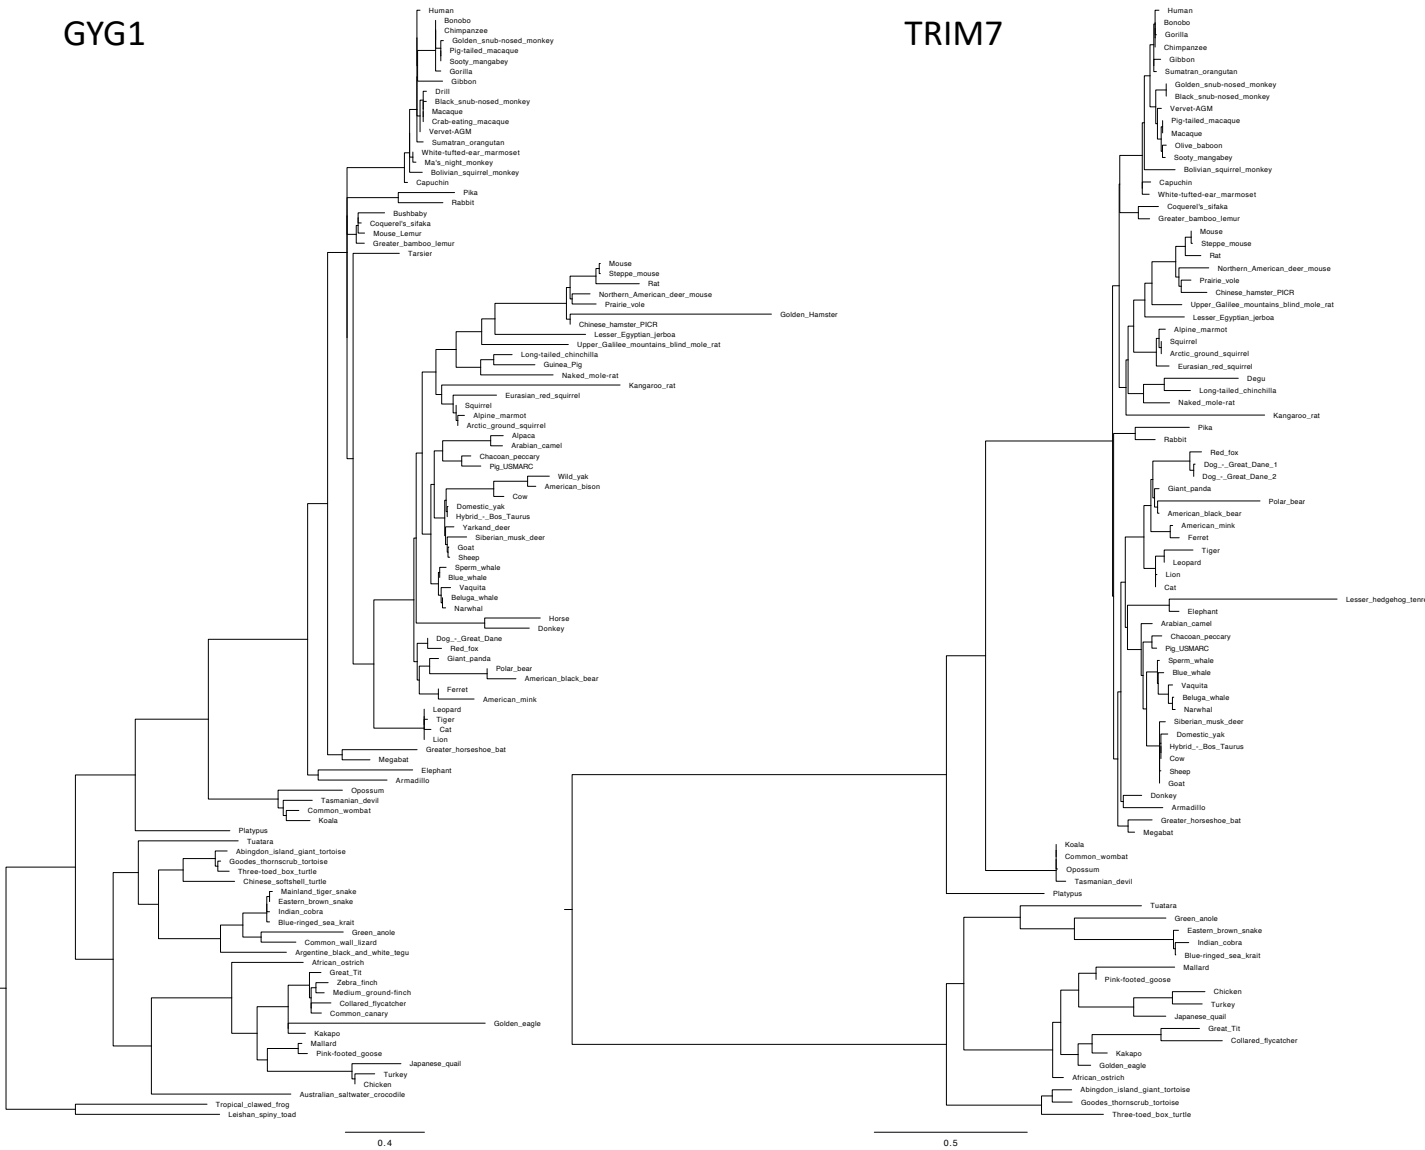

**Figure S9.** Tissue expression of TRIM7 and associated proteins

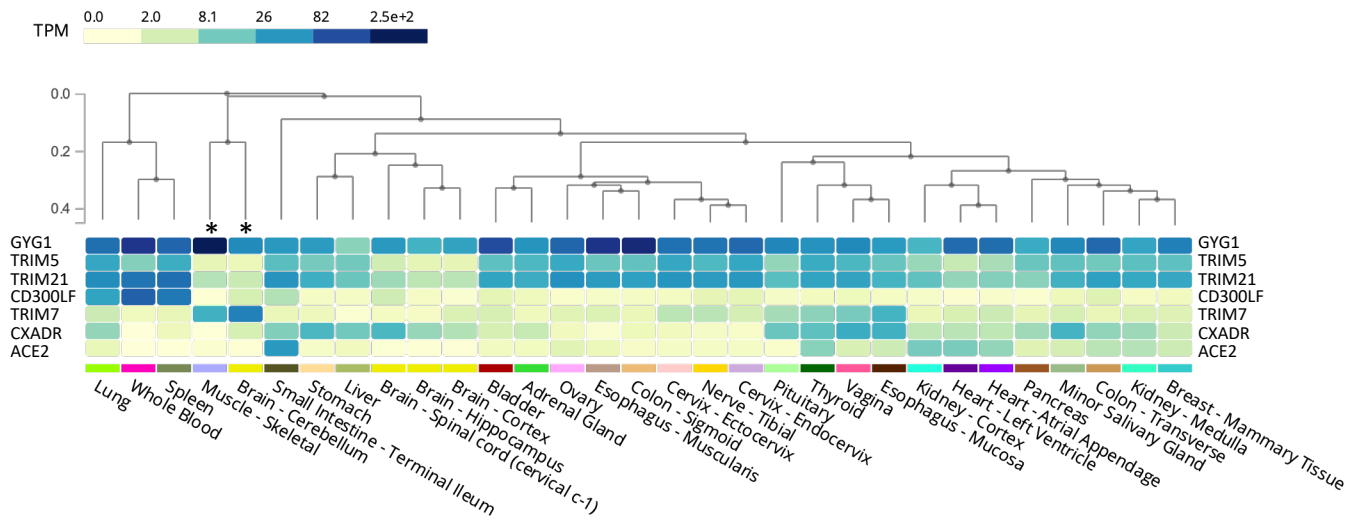

**Table S1 Data collection and refinement statistics**

|                                                       | 7OVX<br>(TRIM7:<br>GYG1 <sub>322-333</sub> ) | 7OW2<br>(TRIM7:<br>RACO-1 <sub>229-235</sub> ) | 8A5L<br>(TRIM7:2C <sub>208-214</sub> ) | 8A5M<br>(TRIM7:MNV1-<br>NS6 <sub>1171-1177</sub> ) | 8A8X<br>(TRIM7:MNV1-<br>NS3 <sub>699-705</sub> ) |
|-------------------------------------------------------|----------------------------------------------|------------------------------------------------|----------------------------------------|----------------------------------------------------|--------------------------------------------------|
| <b>Data collection</b>                                |                                              |                                                |                                        |                                                    |                                                  |
| Space group                                           | P212121                                      | P61                                            | P65                                    | P1211                                              | P1211                                            |
| Cell dimensions<br><i>a</i> , <i>b</i> , <i>c</i> (Å) | 37.63,<br>54.23,<br>81.40                    | 108.12,<br>108.12,<br>137.14                   | 79.89, 79.89,<br>53.2                  | 40.92, 112.97,<br>53.04                            | 51.25, 53.67,<br>73.60                           |
| $\alpha$ , $\beta$ , $\gamma$ (°)                     | 90.0, 90.0,<br>90.0                          | 90.0, 90.0,<br>120.0                           | 90.0, 90.0,<br>120.0                   | 90.0, 102.93, 90                                   | 90, 105.5, 90                                    |
| Resolution (Å)                                        | 19.3-1.7<br>(1.78-1.70)                      | 93.64-2.2<br>(2.29-2.20)                       | 29-1.62 (1.62-<br>1.66)                | 112.97-2.92<br>(3.10-2.92)                         | 70.91-2.37<br>(2.37-2.43)                        |
| <i>R</i> <sub>meas</sub>                              | 9.6 (30.1)                                   | 10.3 (48.1)                                    | 11.4 (92.5)                            | 9.4 (N/A)                                          | 17.7 (96.1)                                      |
| CC <sub>1/2</sub> (%)                                 | 99.4 (91.2)                                  | 99.7 (96.3)                                    | 99.7 (59.9)                            | 96.4(33.8)                                         | 100 (60)                                         |
| <i>I</i> / $\sigma$ <i>I</i>                          | 8.9 (2.8)                                    | 12.6 (3.1)                                     | 11.1 (1.6)                             | 24.4(1.4)                                          | 6.8 (1.2)                                        |
| Completeness (%)                                      | 99.0 (98.8)                                  | 99.2 (98.5)                                    | 99.7 (95.6)                            | 99.9 (98.8)                                        | 97.4 (74.4)                                      |
| Redundancy                                            | 3.3 (3.1)                                    | 6.4 (5.6)                                      | 4.9 (3.7)                              | 3.5 (3.4)                                          | 3.3 (2.4)                                        |
| Resolution (Å)                                        | 1.7                                          | 2.2                                            | 1.62                                   | 2.92                                               | 2.37                                             |
| No. reflections                                       | 17598                                        | 47982                                          | 24565                                  | 10246                                              | 15418                                            |
| <i>R</i> <sub>work</sub> / <i>R</i> <sub>free</sub>   | 0.18/0.22                                    | 0.20/0.24                                      | 0.15/0.18                              | 0.19/0.29                                          | 0.19/0.26                                        |
| No. atoms                                             | 1657                                         | 5750                                           | 1619                                   | 2857                                               | 2875                                             |
| Protein                                               | 1506                                         | 5614                                           | 1443                                   | 2815                                               | 2819                                             |
| Ligand/ion                                            | 0                                            | 2                                              | 10                                     | 15                                                 | 0                                                |
| Water                                                 | 151                                          | 135                                            | 152                                    | 24                                                 | 56                                               |
| <b>B-factors</b>                                      |                                              |                                                |                                        |                                                    |                                                  |
| Protein                                               | 21.81                                        | 41.62                                          | 17.99                                  | 57.69                                              | 30.68                                            |
| Ligand/ion                                            | 0                                            | 46.39                                          | 33.52                                  | 92                                                 | N/A                                              |
| Water                                                 | 33.54                                        | 36.74                                          | 30.03                                  | 33.6                                               | 26.02                                            |
| <b>R.m.s. deviations</b>                              |                                              |                                                |                                        |                                                    |                                                  |
| Bond lengths (Å)                                      | 0.01                                         | 0.01                                           | 0.01                                   | 0.01                                               | 0.01                                             |
| Bond angles (°)                                       | 1.60                                         | 1.40                                           | 1.7                                    | 1.9                                                | 1.7                                              |

\*Values in parentheses are for highest-resolution shell.

**Table S2** – ITC data. Concentration for proteins and peptides is given as monomer. \* indicates where N was fixed in analysis. \*\*Concentration of GYG1 (and MBP-T7-CC-PS) dimer was used in the analysis. NB = no binding.

| TRIM7         | CONC. [UM] | LIGAND                        | CONC. [UM] | SEQUENCE     | N            | K <sub>D</sub> | ΔH (CAL/MOL) | TEMP[°C] |
|---------------|------------|-------------------------------|------------|--------------|--------------|----------------|--------------|----------|
| HTR7-PS WT    | 500        | rbGYG1                        | 100        | see methods  | 1.07±0.014   | 2.2 μM±0.17    | -7271±130    | 15       |
| MTR7-PS WT    | 500        | rbGYG1                        | 100        | see methods  | 0.93±0.005   | 1.5 μM±0.27    | -1113±79     | 15       |
| MTR7-PS WT    | 500        | mGYG1                         | 100        | see methods  | 0.96±0.008   | 1.04 μM ±0.15  | -1192±132    | 15       |
| HTR7-PS WT    | 20         | hGYG1-GN1                     | 400        | see methods  | 0.42±0.03 ** | 2.16 μM±0.06   | -27000±3300  | 25       |
| HTR7-PS WT    | 500        | rbGYG1 <sub>VR-ClV</sub>      | 100        | see methods  | 1.05±0.011   | 2.6 μM ±0.33   | -6433±95     | 15       |
| HTR7-PS WT    | 500        | rbGYG1 <sub>ClV</sub>         | 100        | see methods  | 0.70±0.034   | 4.8μM ±4.0     | -9191±615    | 15       |
| HTR7-PS WT    | 500        | rbGYG322-333                  | 50         | DNIKKKLDTYLQ | 0.70±0.03    | 21 ± 1.8 μM    | -9191±615    | 15       |
| HTR7-PS WT    | 25         | hGYG1322-333                  | 250        | DNIKRKLDTYLQ | 0.97±0.02    | 8 ± 0.64 μM    | -11200±383   | 20       |
| HTR7-PS WT    | 25         | RACO-1 <sub>227-235</sub>     | 250        | NLGLSMLQ     | 0.61±0.04    | 7.9 ± 1.06 μM  | -6360±561    | 20       |
| HTR7-PS WT    | 20         | CVB-2C <sub>208-214</sub>     | 400        | TIEALFQ      | 0.90±0.2     | 11.2 ± 4.2 μM  | -12600±3580  | 25       |
| HTR7-PS WT    | 20         | MNV1-NS6 <sub>1172-1178</sub> | 400        | LEALEFQ      | 1.13±1.62    | 8.7 ± 3.2 μM   | -11700±2250  | 25       |
| HTR7-PS WT    | 20         | MNV1-NS3 <sub>700-706</sub>   | 400        | HDDFGLQ      | 1.18±0.19    | 14.3 ± 4.3 μM  | -10900±2280  | 25       |
| HTR7-PS WT    | 20         | polyA                         | 400        | AAAAAAA      | NB           | NB             | NB           | 25       |
| HTR7-PS WT    | 20         | polyA-LQ                      | 400        | AAAAALQ      | 1*           | 8.92 ± 3.03 μM | -4870±513    | 25       |
| HTR7-PS WT    | 20         | LQ                            | 2000       | LQ           | 1*           | 201 ± 30 μM    | -5720±507    | 25       |
| HTR7-PS WT    | 20         | Ac-LQ                         | 800        | Ac-LQ        | 1*           | 144 ± 26 μM    | -6600±760    | 25       |
| HTR7-PS WT    | 20         | Ac-LLQ                        | 800        | Ac-LLQ       | 1*           | 38.7 ± 5.16 μM | -7720±484    | 25       |
| HTR7-PS WT    | 20         | TIEALFA                       | 400        | TIEALFA      | NB           | NB             | NB           | 25       |
| HTR7-PS WT    | 20         | AIEALFQ                       | 400        | AIEALFQ      | 0.80±0.19    | 17.0 ± 4.3 μM  | -15500±4410  | 25       |
| HTR7-PS N383A | 25         | hGYG1322-333                  | 250        | DNIKRKLDTYLQ | NB           | NB             | NB           | 20       |
| HTR7-PS T384A | 25         | hGYG1322-333                  | 250        | DNIKRKLDTYLQ | 0.71±0.18    | 22.6 ± 6.6 μM  | -7280±2410   | 20       |
| HTR7-PS R385A | 25         | hGYG1322-333                  | 250        | DNIKRKLDTYLQ | NB           | NB             | NB           | 20       |
| HTR7-PS L423A | 25         | hGYG1322-333                  | 250        | DNIKRKLDTYLQ | NB           | NB             | NB           | 20       |
| HTR7-PS F426A | 25         | hGYG1322-333                  | 250        | DNIKRKLDTYLQ | NB           | NB             | NB           | 20       |
| HTR7-PS Q436A | 25         | hGYG1322-333                  | 250        | DNIKRKLDTYLQ | NB           | NB             | NB           | 20       |
| HTR7-PS N438A | 25         | hGYG1322-333                  | 250        | DNIKRKLDTYLQ | 0.64±0.02    | 2.32 ± 0.26 μM | -9830±318    | 20       |
| HTR7-PS N383A | 25         | RACO-1 <sub>227-235</sub>     | 250        | NLGLSMLQ     | NB           | NB             | NB           | 20       |
| HTR7-PS T384A | 25         | RACO-1 <sub>227-235</sub>     | 250        | NLGLSMLQ     | 0.99±0.05    | 12.3 ± 2.00 μM | -2870±253    | 20       |
| HTR7-PS R385A | 25         | RACO-1 <sub>227-235</sub>     | 250        | NLGLSMLQ     | NB           | NB             | NB           | 20       |
| HTR7-PS L423A | 25         | RACO-1 <sub>227-235</sub>     | 250        | NLGLSMLQ     | NB           | NB             | NB           | 20       |
| HTR7-PS F426A | 25         | RACO-1 <sub>227-235</sub>     | 250        | NLGLSMLQ     | NB           | NB             | NB           | 20       |
| HTR7-PS Q436A | 25         | RACO-1 <sub>227-235</sub>     | 250        | NLGLSMLQ     | NB           | NB             | NB           | 20       |
| HTR7-PS N438A | 25         | RACO-1 <sub>227-235</sub>     | 250        | NLGLSMLQ     | 0.67±0.08    | 3.93 ± 1.75 μM | -4930±852    | 20       |
| HTR7-PS N383A | 20         | CVB-2C <sub>208-214</sub>     | 400        | TIEALFQ      | NB           | NB             | NB           | 25       |
| HTR7-PS T384A | 20         | CVB-2C <sub>208-214</sub>     | 400        | TIEALFQ      | 1 *          | 21.2 ± 5.84 μM | -6120±704    | 25       |
| HTR7-PS R385A | 20         | CVB-2C <sub>208-214</sub>     | 400        | TIEALFQ      | NB           | NB             | NB           | 25       |
| HTR7-PS L423A | 20         | CVB-2C <sub>208-214</sub>     | 400        | TIEALFQ      | NB           | NB             | NB           | 25       |
| HTR7-PS F426A | 20         | CVB-2C <sub>208-214</sub>     | 400        | TIEALFQ      | NB           | NB             | NB           | 25       |
| HTR7-PS Q436A | 20         | CVB-2C <sub>208-214</sub>     | 400        | TIEALFQ      | NB           | NB             | NB           | 25       |
| HTR7-PS N438A | 20         | CVB-2C <sub>208-214</sub>     | 400        | TIEALFQ      | 0.92±0.06    | 7.82 ± 1.18 μM | -10400±910   | 25       |
| HTR7-PS R385A | 20         | MNV1-NS6 <sub>1172-1178</sub> | 400        | LEALEFQ      | NB           | NB             | NB           | 25       |
| HTR7-PS R385A | 20         | MNV1-NS3 <sub>700-706</sub>   | 400        | HDDFGLQ      | NB           | NB             | NB           | 25       |
| HTR7-CC-PS WT | 12         | hGYG322-333                   | 300        | DNIKRKLDTYLQ | 1.7 ± 0.8    | 15 ± 6 μM      | -9680±5770   | 25       |
| HTR7-CC-PS WT | 12         | hGYG1-GN1                     | 150        | see methods  | 0.8 ± 0.02   | 0.16 ± 0.05 μM | -23800±991   | 25       |
